# Supplementary material for: Decomposable double-walled hybrid nanorods: formation mechanism and their effect on flame retardancy of epoxy resin composites
Source: Royal Society of Chemistry journal article supplement (doi:10.1039/c5ta02149a), 2015-01-01
Supplement: c5ta02149a1.pdf [file c5ta02149a1.pdf]

## Supporting Information

### Decomposable Double-walled hybrid nanorods: formation mechanism and their effect on flame retardancy of the epoxy resin composite

*Yawen Huang, Shiqiang Song, Yu Yang, Ke Cao, Junxiao Yang\* and Guanjin Chang*

#### 1. Characterization of nanorods: $^{27}\text{Al}$ NMR, TGA and XRD

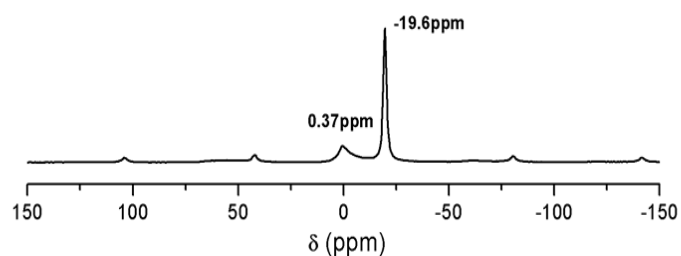

**Figure S1.**  $^{27}\text{Al}$  NMR of ASPH-NR.

#### 2. Contrast reactions varying conditions

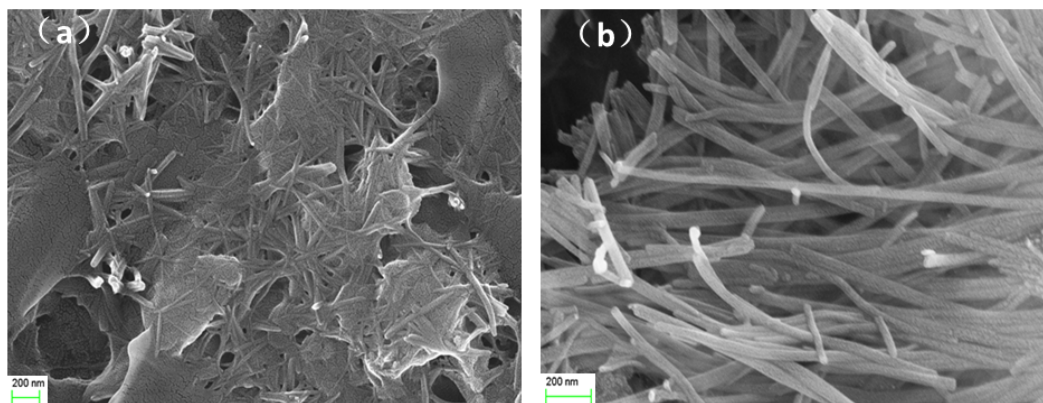

**Figure S2.** SEM images of ASPH-NRs produced from different reaction conditions.

a) 100 °C under ambient pressure for 12 h; b) 160 °C under hydrothermal conditions for 12 h.

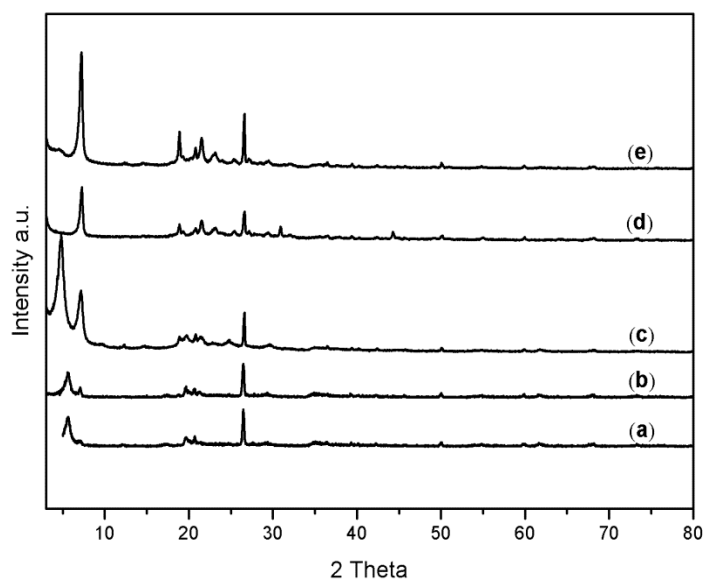

**Figure S3.** XRD patterns of ASPH-NRs produced from different reaction temperature.

a) 40 °C; b) 60 °C; c) 100 °C; d) 120 °C; e) 160 °C.

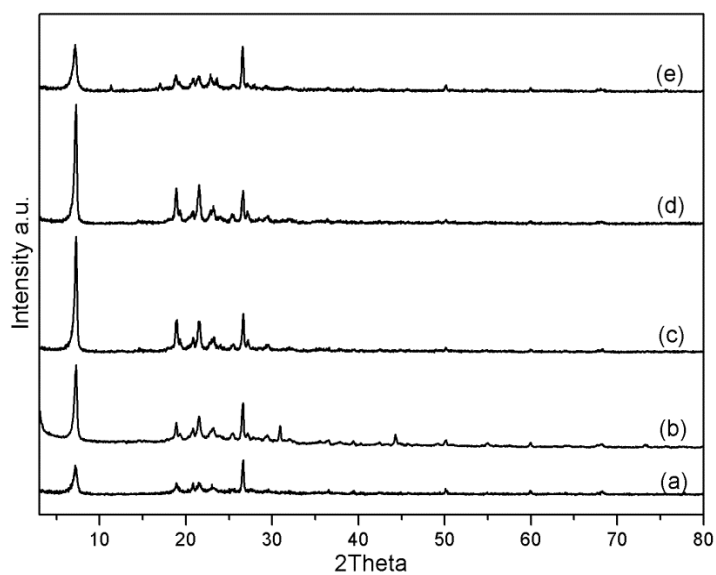

**Figure S4.** XRD patterns of ASPH-NRs produced from different OMMT/DPPA

weight ratio. a) OMMT: DPPA=1:1; b) OMMT: DPPA=1:2; c) OMMT: DPPA=1:3;

d) OMMT: DPPA=1:4; e) OMMT: DPPA=1:5.

### 3. Contrast reactions varying phosphonic acids

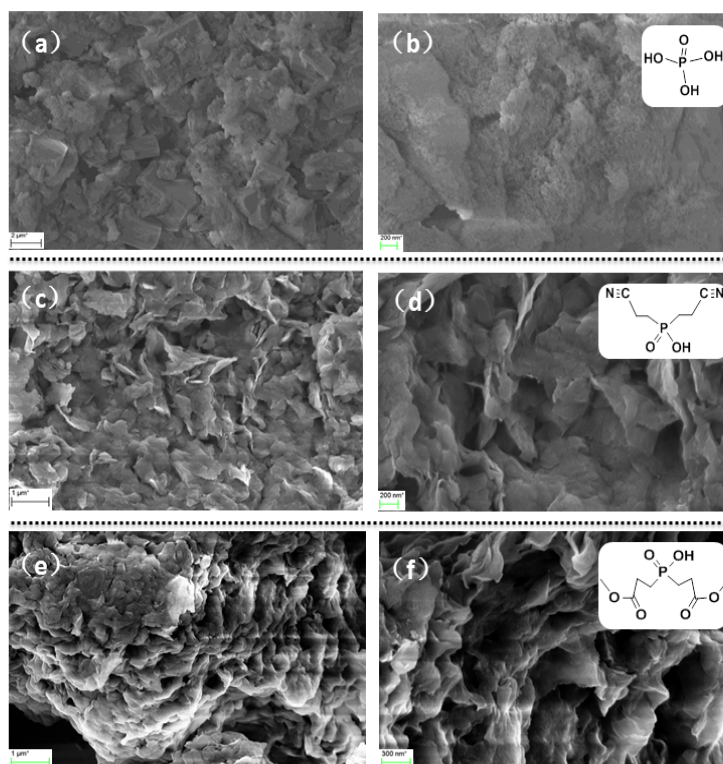

**Figure S5.** SEM images of the products obtained from the reaction of OMMT with phosphoric acid (a-b); bis(2-cyanoethyl)phosphinic acid (c-d); bis(3-methoxy-3-oxopropyl)phosphinic acid (e-f)

### 4. DMA results of Epoxy/ASPH-NRs nanocomposites

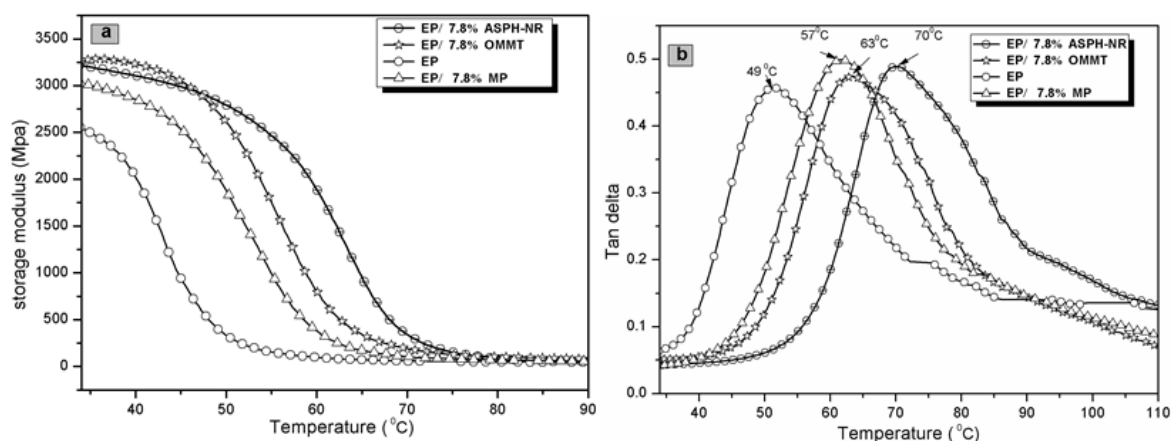

**Figure S6.** DMA results of EP and EP composites. (a) Storage modulus-temperature curves with temperature; (b) Tan  $\delta$ -temperature curves.
